1           **A novel deep-sea bacterial threonine dehydratase drives cysteine**  
2                                   **desulfuration and hydrogen sulfide production**

3                           Ning Ma<sup>1,2,3,4†</sup>, Yufan Sun<sup>5†</sup>, Wen Zhang<sup>6,7\*</sup>, Chaomin Sun<sup>1,2,4\*</sup>

4           <sup>1</sup>CAS Key Laboratory of Experimental Marine Biology, Institute of Oceanology,  
5           Chinese Academy of Sciences, Qingdao 266071, China; <sup>2</sup>Laboratory for Marine  
6           Biology and Biotechnology, Qingdao National Laboratory for Marine Science and  
7           Technology, Qingdao 266071, China; <sup>3</sup>College of Earth Science, University of  
8           Chinese Academy of Sciences, Beijing 100049, China; <sup>4</sup>Center for Ocean  
9           Mega-Science, Chinese Academy of Sciences, Qingdao, 266071, China; <sup>5</sup>Department  
10          of Medical Microbiology, Key Laboratory of Medical Molecular Virology of  
11          Ministries of Education and Health, School of Basic Medical Sciences, Fudan  
12          University, Shanghai 200032, China; <sup>6</sup>Fudan University Pudong Medical Center,  
13          Shanghai Key Laboratory of Medical Epigenetics, Institutes of Biomedical Sciences,  
14          Fudan University, Shanghai 200032, China; <sup>7</sup>The Department of Systems Biology for  
15          Medicine, School of Basic Medical Sciences, Fudan University, Shanghai 200032,  
16          China.

17

18          \*Corresponding author

19                   Chaomin Sun      Tel.: +86 532 82898857; fax: +86 532 82898857.

20                                   E-mail address: [sunchaomin@qdio.ac.cn](mailto:sunchaomin@qdio.ac.cn)

21                   Wen Zhang      Tel.: +86 21 54237880;

22                                   E-mail address: [wenz@fudan.edu.cn](mailto:wenz@fudan.edu.cn)

23

24          †These authors contributed equally to this work.

25          **Short title:** A novel cysteine desulfurase

26 **ABSTRACT**

27 Cysteine desulfuration is one of the main ways for hydrogen sulfide (H<sub>2</sub>S) generation  
28 in cells and is usually conducted by cystathionine  $\gamma$ -lyase. Herein, we describe a  
29 newly discovered deep-sea bacterial threonine dehydratase (psTD), which is  
30 surprisingly discovered to drive L-cysteine desulfuration. The mechanisms of psTD  
31 catalyzing cysteine desulfuration towards H<sub>2</sub>S production are first clarified *in vitro*  
32 and *in vivo* through a combination of genetic and biochemical methods. Furthermore,  
33 based on the solved structures of psTD and its various mutants, two or three pockets  
34 are found in the active site of psTD, and switch states between inward and outward  
35 orientation of a key amino acid R77 determine the open or close status of Pocket III  
36 for small molecule exchanges, which further facilitates cysteine desulfuration. Our  
37 results reveal the functional diversity and structural specificity of psTD towards  
38 L-cysteine desulfuration and H<sub>2</sub>S formation. Given the broad distribution of psTD  
39 homologs in different bacteria, we speculate that some threonine dehydratases have  
40 evolved a novel function towards cysteine desulfuration, which benefits the producer  
41 to utilize cysteine as a sulfur source for better adapting external environments.

42

43

44

## 45 INTRODUCTION

46 The important life-supporting role of hydrogen sulfide (H<sub>2</sub>S) has been found  
47 from bacteria to plants, and finally to mammals (Wang, 2012). In bacteria,  
48 endogenous H<sub>2</sub>S is involved in stress responses, such as oxidative stress and  
49 antibiotics, and the assembly of intracellular [Fe-S] clusters which are ubiquitous and  
50 evolutionary ancient prosthetic groups required to sustain fundamental life processes  
51 (Johnson et al, 2005; Mihara & Esaki, 2002; Mironov et al, 2017; Shatalin et al, 2011).  
52 L-cysteine is a common substrate in many bacterial species for H<sub>2</sub>S generation, which  
53 is catalyzed by cysteine desulfurases using pyridoxal 5'-phosphate (PLP)-based  
54 chemistry (Chiku et al, 2009; Mihara & Esaki, 2002; Szabo, 2018; Wendisch, 2007).  
55 Bacterial cysteine desulfurases include cystathionine β-synthase (CBS), cystathionine  
56 γ-lyases (CSE), *O*-acetylserine sulfhydrylase (OASS), et al (Awano et al, 2005; Devi  
57 et al, 2017; Dunleavy et al, 2016). In *Escherichia coli*, five different enzymes have  
58 been identified to possess cysteine desulfurase activity, which including cystathionine  
59 β-lyase (MetC), cysteine synthase A/*O*-acetylserine sulfhydrylase A (CysK), cysteine  
60 synthase B/*O*-acetylserine sulfhydrylase B (CysM), β-cystathionase (MalY), and  
61 tryptophanase (TNaA) (Awano et al, 2005).

62 PLP-dependent enzymes catalyze manifold reactions of amino acid metabolism  
63 (Alexander et al, 1994). Threonine dehydratase (TD), also named threonine  
64 deaminase, belongs to the β-family of PLP-dependent enzyme catalyzing the  
65 formation of α-ketobutyrate and NH<sub>3</sub> from L-threonine (Schomburg & Salzmann,  
66 1990; Simanshu et al, 2006). It also catalyzes the deamination of L-serine,  
67 L-homoserine, β-chloro-L-alanine and L-allothreonine (Schomburg & Salzmann,  
68 1990). Two types of TD have been found in bacteria: the biosynthetic threonine  
69 dehydratase (BTD) and the catabolic threonine dehydratase (CTD) (Yu et al, 2013).  
70 BTD, encoded by the gene *ilvA*, is expressed under aerobic conditions and catalyzes  
71 the first reaction in the isoleucine biosynthesis pathway (Gallagher et al, 1998).  
72 L-isoleucine and L-valine act as an allosteric inhibitor and an activator, respectively  
73 (Gallagher et al, 1998). *IlvA* protein provided one of the earliest examples of feedback

74 inhibition (Umbarger, 1956). CTD, encoded by the gene *tdcB*, is induced  
75 anaerobically and catalyzes the first reaction in the degradation of L-threonine to  
76 propionate (Simanshu et al, 2007). Unlike IlvA, TdcB protein is insensitive to  
77 L-isoleucine and L-valine and is activated by AMP (Simanshu et al, 2006). In *E. coli*,  
78 cysteine has been shown to inhibit TD activity, resulting in transient amino acid  
79 starvation, which can be reversed by threonine (Harris, 1981). However, TD has not  
80 previously been shown to have a cysteine desulfurase activity.

81 In the current work, a deep-sea bacterium *Pseudomonas stutzeri* 273 was found to  
82 produce substantial amounts of H<sub>2</sub>S in the presence of cysteine, and TD of this  
83 bacterium (psTD) was demonstrated to drive L-cysteine desulfuration. A combination  
84 of the proteomic method together with gene knockout approaches revealed that psTD  
85 drove L-cysteine desulfuration and thereby the generation of H<sub>2</sub>S in *P. stutzeri* 273.  
86 Furthermore, structural insights of psTD mediating L-cysteine desulfuration were  
87 detailedly disclosed. Overall, this work reports a previously undocumented cysteine  
88 desulfurase activity for bacterial TD both *in vivo* and *in vitro*.

## 89 RESULTS

### 90 psTD drives L-cysteine desulfuration *in vivo*.

91 Originally, we observed that addition of L-cysteine promoted *P. stutzeri* 273 to  
92 generate substantial amounts of H<sub>2</sub>S (Fig. 1A). To investigate the response of *P.*  
93 *stutzeri* 273 when exposed to L-cysteine, we performed proteomic analyses of *P.*  
94 *stutzeri* 273 incubated in LB and LB supplemented with 8 mmol/L L-cysteine. Among  
95 the significantly up-regulated proteins, four were associated with sulfur metabolism  
96 (Fig. 1B). Meanwhile, the expression of pyridoxal kinase for pyridoxal 5'-phosphate  
97 (PLP) synthesis was significantly increased (Fig. 1B). Of the four proteins, psTD is  
98 one of the proteins containing a PLP binding domain (Fig. S1), which is an obligate  
99 cofactor required for cysteine desulfuration (Majtan et al, 2018; Mihara & Esaki, 2002;  
100 Sun et al, 2009). Based on the proteomic results, we propose that psTD might involve  
101 in the cysteine metabolism of *P. stutzeri* 273.

102 To evaluate corresponding roles of psTD and other two cystathionine  $\gamma$ -lyases  
103 determining the production of H<sub>2</sub>S in *P. stutzeri* 273, we constructed a series of  
104 deletion mutants targeting the genes encoding psTD ( $\Delta TD$ ), cystathionine  $\gamma$ -lyase 1  
105 ( $\Delta CSE1$ ), cystathionine  $\gamma$ -lyase 2 ( $\Delta CSE2$ ), or different combinations. Thereafter, cell  
106 extracts from wild-type *P. stutzeri* 273 and the corresponding mutants were analyzed  
107 using in-gel activity assays for detecting the potential H<sub>2</sub>S-producing enzymes.  
108 Clearly, wild-type *P. stutzeri* 273 could degrade L-cysteine to produce H<sub>2</sub>S, as could  
109 the mutants  $\Delta CSE1$ ,  $\Delta CSE2$ , and  $\Delta CSE1\Delta CSE2$  (Fig. 1C). However, the ability to  
110 generate H<sub>2</sub>S was compromised in  $\Delta TD$  (Fig. 1C), which showed lower levels of H<sub>2</sub>S  
111 production than wild-type *P. stutzeri* 273 (PS273),  $\Delta CSE1$ ,  $\Delta CSE2$ , and  $\Delta CSE1\Delta CSE2$   
112 (Fig. 1D). Complementing  $\Delta TD$  with the wild-type psTD gene ( $\Delta TD/cTD$ ) restored  
113 H<sub>2</sub>S production (Fig. 1C). Thus, we conclude psTD plays a key role in catalyzing  
114 L-cysteine desulfuration and H<sub>2</sub>S formation in *P. stutzeri* 273 *in vivo*.

#### 115 **psTD drives L-cysteine desulfuration *in vitro*.**

116 To determine whether psTD was capable of catalyzing H<sub>2</sub>S generation from  
117 L-cysteine *in vitro*, it was over-expressed and purified from the *E. coli* BL21 cell line.  
118 Recombinant psTD showed a strong absorbance at 412 nm, a typical symbol of  
119 covalently bound PLP (Fig. 2A), and it is consistent with the presence of a PLP  
120 binding domain in psTD (Fig. S1). psTD generated H<sub>2</sub>S from L-cysteine in the in-gel  
121 activity assay (Fig. 2A), consistent with the *in vivo* assay (Fig. 1C). Moreover, we  
122 identified L-serine as one of the downstream products (Fig. 2B) based on a previous  
123 report (Chiku et al, 2009). Pyruvate, a downstream product of L-serine, was also  
124 detected by spectrophotometry (Fig. 2C). In addition, psTD had a more substantial  
125 catalytic velocity when compared to other CSEs according to the intrinsic kinetics of  
126 the reaction (Table S2). Together, we propose that psTD catalyzes the following  
127 reaction: L-cysteine + H<sub>2</sub>O  $\rightarrow$  L-serine + H<sub>2</sub>S  $\rightarrow$  pyruvate + NH<sub>3</sub> + H<sub>2</sub>S (Fig. 2D).

#### 128 **Structural basis of psTD catalyzing L-cysteine desulfuration.**

129 To better understand the catalytic mechanism of psTD-driven L-cysteine desulfuration,  
130 the crystal structures of psTD wild type and corresponding mutant, and complex

131 bound with PLP were determined (Table 1). The crystal structures of psTD were  
132 solved around 1.5~2Å in two conditions, C6 (PDB 7DAP) and E11 (with high  
133 concentration  $\text{NH}_4^+$ , PDB 7DAQ). The structure of psTD is an asymmetric  
134 homodimer possessing two similar subunits (superposition with  $\text{RMSD}=0.20\text{\AA}$ ) (Fig.  
135 S2A). Each subunit is highly conserved to the structure of 1TDJ (TD from *E coli*,  
136 superposition with  $\text{RMSD}=1.67\text{\AA}$ ), although the identity is only 31% between two  
137 sequences (Fig. S2B).

138 As PLP is a co-enzyme of TD and is essential for TD to perform catalytic activity,  
139 thus co-crystal structure of complex containing psTD and PLP was solved and  
140 analyzed (PDB 7D8Y). The structural results show that PLP binds to the amino acid  
141 K51 with both covalent and non-covalent bonds and occupies one pocket of active  
142 site from several resolved crystals (Fig. 3A). Consistently, the sequence alignment of  
143 TD protein families indicates that the key residue of active site is K51 (Fig. S3A). It is  
144 noting that PLP may be missing in the site when high concentration  $\text{NH}_4^+$  is present in  
145 the crystallization buffer since  $\text{NH}_4^+$  may occupy one or two pockets around K51 in  
146 the active site (Fig. 3B). Moreover, the sidechain of the amino acid R77 interacts with  
147 PLP in C6 crystal structure while it is orientating to protein surface in high  $\text{NH}_4^+$   
148 crystal structure since the active site is occupied by  $\text{NH}_4^+$  (Fig. 3C). Therefore,  $\text{NH}_4^+$   
149 may prevent the sidechain of R77 from orientating inside of protein as well as binding  
150 with PLP, which is consistent with the proposal that  $\text{NH}_4^+$  (as a catalytic product) may  
151 reduce substrate concentration and slow down the reaction as negative feedback (Figs.  
152 2D and 3B). The reduced activity of psTD caused by  $\text{NH}_4^+$  further confirms this view  
153 (Fig. 3D). Interestingly, the conformation change and alternative conformation of R77  
154 sidechain observed in chain A and chain B imply the dynamics and specific function  
155 of R77 (Fig. 3C and Fig. S4A). To explore the potential function of R77, the structure  
156 of psTD with mutation of R77E (R is mutated to E; PDB 7DAR) was also solved for  
157 comparison. The results show that there are alternative sidechains for E77 in chain A  
158 and alternative mainchain for amino acid G78 in chain B of 7DAR, where the  
159 sidechain of amino acid E77 is extending to protein surface (Fig. 3E).

160 The inside active sites in different psTD structures were further compared by the  
161 map of electrostatic potential (MEP). PLP binds deep inside the psTD structure with  
162 positive charged pockets around catalytic key residue K51 (Fig. 4A). Besides, the  
163 active site of psTD is unique in sharp and could be switchable at the gate position near  
164 R77 in some structure states (Fig. 4B). In the structure 7DAQ, there are an amino acid  
165 residue bound by K51 and two  $\text{NH}_4^+$  ions instead of PLP in chain A, while PLP with  
166 weak density is present in chain B with non-covalent binding to K51, together with  
167 one  $\text{NH}_4^+$  ion in another pocket (Figs. 3B and 4B). In the structure 7DAR, the E77  
168 with negative charged sidechain may block the gate of the active site by negative  
169 potential gap at the psTD surface (Fig. 4C). Consistently, psTD with mutation R77E  
170 significantly reduces the catalytic activity to form  $\text{H}_2\text{S}$  (Fig. 3D).

171 Furthermore, there are intensive hydrogen-bond interactions between phosphate  
172 group of PLP and amino acids G177-G181 (GLGSG), A277, S302 as well as the salt  
173 bridge interaction between phosphate group of PLP and the specific residue R77,  
174 therefore these residues may stabilize the PLP binding (Fig. 5). Notably, the sequence  
175 motifs around amino acids F50-K51, A75-H80 and G177-G181 are conserved through  
176 whole TD family (Fig. 5E), indicating the threonine dehydratase function of psTD is  
177 conserved and ubiquitously exists in different microorganisms. While the unique  
178 cysteine desulfuration may result from specific structure and motifs associated with  
179 the diversity positions, such as R77 and the relevant residues near active site.

#### 180 **Two or three pockets in the active site determine the catalytic function of psTD.**

181 Notably, MEP comparison of active sites between structures 7D8Y (psTD-PLP  
182 complex) and 1TDJ (TD homolog from *E. coli*) shows that the active site for 7D8Y is  
183 close to U shaped channel which could be divided into two or three pockets (Fig. 6  
184 and Fig. 7). Pocket I (PI) is occupied by PLP and Pocket II (PII) is on another side of  
185 K51 (Figs. 7A and 7B). Pocket III (PIII), the access channel, opens at the surface of  
186 7D8Y around R77 and only presents with R77 outward orientation (Figs. 6, 7C, and  
187 7D). The residues interacting with PLP (as PI of active site) are highly conserved at  
188 the structural level except flexibility of R77 and G181, although the sequence motifs

189 are relatively similar, together with some diversity positions at T76, R77, L178, S180,  
190 G181, A277, S302, et al (Fig. S5B). The structural conservation is consistent with the  
191 phylogenetic classification and sequence motifs of TD family (Figs. S2E, S2F, S3B,  
192 S7). Interestingly, there is only one pocket to hold PLP at the active sites from 1TDJ,  
193 1P5J, 6VJU (1P5J: Ser dehydratase, 6VJU: Cys synthase), which is directly opened to  
194 protein surface (corresponding to PIII) and mostly conserved with PI of 7D8Y at the  
195 structural level (Fig. 6). The small molecules of reaction products are favorable to  
196 bind in PII, which may result in multiple functions including cysteine desulfuration  
197 based on its structure and sequence specificity. Besides the structure difference with  
198 pockets, there is also some sequence diversity at L151, C233 for PII and PIII,  
199 respectively (Fig. S5).

200 As mentioned above, the R77 has alternative sidechain conformations in 7D8Y:  
201 one is interacting with PLP (inward state with PI and PII), and another is orienting to  
202 protein surface (outward state with additional PIII) (Fig. 7E). Active site could expand  
203 more space between pockets and protein surface, so that small molecules could access  
204 the gate of the active site and reach PLP to trigger the further reactions for R77  
205 outward conformation (Fig. 7). The psTD with mutation of R77A could remain  
206 comparable enzyme activity since the gate of active site may keep opened like 1TDJ  
207 (with small sidechain of Ala at corresponding position), while psTD with the mutation  
208 R77E loses its function since its negative charge may block the small molecules to  
209 access the active site (Figs. 3D, 6E, S5A). Therefore, residues near R77 may play a  
210 role as gate-keepers controlling the entry to and from the active site, which has shown  
211 some extended flexibility of the sidechain of R77 and the mainchain near R77 (Pravda  
212 et al, 2014), while the function and mechanism for dynamics of PIII may need further  
213 study.

## 214 **DISCUSSION**

215 In the present study, detailed biochemical and structural mechanisms of psTD driving  
216 L-cysteine desulfuration are first disclosed. The initial clue of psTD mediating



217 L-cysteine desulfuration comes from the proteomic and genetic results (Fig. 1), which  
218 propose psTD as a new candidate for metabolizing L-cysteine in the deep-sea  
219 bacterium *P. stutzeri* 273 (Fig. 1). TD is principally known for catalyzing L-threonine  
220 or L-serine deamination in microorganisms (Ernst & Downs, 2018; Favrot et al, 2018;  
221 Lambrecht et al, 2013). In this study, threonine dehydrase was identified as a new  
222 member of cysteine desulfurases, and the alternative activities of enzymes play an  
223 important role in the diversification of enzymes (O'Brien & Herschlag, 1999). We  
224 speculate cysteine desulfuration catalyzed by psTD might contribute to the  
225 organic/inorganic sulfur of the deep-sea sediment. Overall, the discovery of cysteine  
226 desulfurase activity of psTD introduced a new metabolic pathway for the H<sub>2</sub>S  
227 enzymatic production (Wang, 2012).

228 With biochemical method, the basic process of cysteine desulfuration mediated  
229 by psTD is clear (Figs. 2B-2D), however, the deep catalyzing mechanisms are still  
230 obscure. With this, we further investigated the underlying mechanisms by structural  
231 methods. Based on the structure of psTD, its mutant and complex with PLP, we  
232 clarify that the active site with positive charge can be recognized as two or three  
233 major pockets for PLP (PI) and substrates (PII) binding or the small molecules  
234 exchange (PIII), which are essential in cysteine desulfuration mediated by psTD. PII  
235 and PIII may play a key role in helping determine enzyme specific substrates  
236 (cysteine and serine) as well as specific functions (like cysteine desulfuration, serine  
237 dehydratase) (Figs. 6 and 7). NH<sub>4</sub><sup>+</sup> may occupy one or two pockets and block the PLP  
238 binding as well as the R77 in-ward conformation (Fig. 4 and Fig. S4). Given that  
239 NH<sub>4</sub><sup>+</sup> is a possible catalytical product of the cysteine desulfuration catalyzed by psTD  
240 (Fig. 2D), this phenomenon might be a feedback inhibition of the enzymatic reaction  
241 (Figs. 3, 4, and 7E), which is confirmed by the in-gel activity assay (Fig. 3D). On the  
242 other hand, R77 with inward orientation can stabilize PLP binding through salt bridge  
243 interaction in PI, while R77 with outward orientation may open an access channel  
244 (PIII) of active site (Fig. 7). The mutation analysis shows R77E significantly changes  
245 the charge of gate residue as well as the flexibility of main-chain around residues

246 76-78, which leads to block small molecular traffics (Fig. 4). The MEP of active site  
247 and dynamics and flexibility of R77 may play a key role in enzyme activity, which is  
248 similar to the roles of R62 from hCGL and its structural dynamics described in  
249 previous report (Yan et al, 2017). R77, as the gate-keeper, is a potential switch to  
250 control the small molecules exchange at the gate and in the active site as well as the  
251 reaction type and process at active site (Fig. 7E). Overall, the above results shed light  
252 on mechanisms of psTD catalyzing cysteine to form H<sub>2</sub>S, which consists well with the  
253 results disclosed by genetic, proteomic and biochemical results in this study.

254 Altogether, we first show that psTD mediates cysteine desulfuration both *in vivo*  
255 and *in vitro*. Given the broad distribution of psTD homologs in different bacteria, we  
256 speculate that some threonine dehydratases have evolved a novel function towards  
257 cysteine desulfuration, which benefits the producer to utilize cysteine as a sulfur  
258 source for better adapting external environments.

## 259 MATERIALS AND METHODS

### 260 Strains, media, and chemicals.

261 *Pseudomonas stutzeri* 273 was isolated from the sediment samples collected by RV  
262 *KEXUE* in the East China Sea in the year of 2014 (Wu et al, 2016). *P. stutzeri* 273 and  
263 its mutants were incubated in LB broth (10 g/L peptone, 10 g/L NaCl, 5 g/L yeast  
264 extract, pH 7.0) under vigorous agitation at the speed of 150 rpm at 28 °C.  
265 *Escherichia coli* DH5 $\alpha$  was used as the host for plasmid construction. *E. coli* S17-1  
266 was used as a vector donor in conjugation. *E. coli* BL21 was used for recombinant  
267 protein overproduction. *E. coli* DH5 $\alpha$ , *E. coli* SY327, *E. coli* S17-1, and *E. coli* BL21  
268 were grown in LB medium at 37 °C with shaking speed of 150 rpm. When necessary,  
269 antibiotics were used at the following final concentrations: 25  $\mu$ g/mL chloramphenicol  
270 (Cm), 25  $\mu$ g/mL gentamicin (Gm), 100  $\mu$ g/mL ampicillin (Amp), and 100  $\mu$ g/mL  
271 kanamycin (Kan) (Zhang et al, 2020).

### 272 H<sub>2</sub>S production assay.

273 To detect H<sub>2</sub>S production of *P. stutzeri* 273, bacterial cells were transferred into 5 ml  
274 of LB with the addition of L-cysteine in glass tubes (18\*150 mm). Paper strips with  
275 lead acetate were affixed at the top of the tubes with rubber stoppers. After shaking  
276 incubation for 12 h, the paper strips were photographed to detect the presence of black  
277 lead sulfide precipitates, which is correlated to the production of H<sub>2</sub>S. The estimation  
278 was done by visually matching the darkness of the paper strips (Xia et al, 2017).

#### 279 **Proteomic analysis.**

280 *P. stutzeri* 273 cells were incubated in LB and LB with 8 mmol/L L-cysteine until  
281 OD<sub>600</sub> was 0.8. Then proteins were extracted, separated and identified using liquid  
282 chromatography- tandem mass spectrometry (LC-ESI-MS/MS) analysis. The  
283 bioinformatic analyses of protein annotation, functional classification, functional  
284 enrichment and cluster analyses were performed. The heat map of differently  
285 expressed proteins (1.5-fold change cutoff and *P* value less than 0.05) was made by  
286 the software Heml 1.0.3.3.

#### 287 **Bioinformatics analysis.**

288 *P. stutzeri* 273 was collected in China General Microbiological Culture Collection  
289 Center under collection number CGMCC 7.265. The complete genome sequence of *P.*  
290 *stutzeri* 273 has been deposited at GenBank under the accession number CP015641  
291 (Wu et al, 2017). The gene sequences of *threonine dehydratase* (*psTD*, accession  
292 number PS273GM\_RS04065), *cystathionine γ-lyase1* (*CSE1*, accession number  
293 PS273GM\_RS00775) and *cystathionine γ-lyase2* (*CSE2*, accession number  
294 PS273GM\_RS06855) were obtained from GenBank. The consensus phylogenetic tree  
295 of *psTD* in *P. stutzeri* 273 with other related proteins obtained from GenBank was  
296 constructed by the maximum likelihood method with MEGA 7.0 (Kumar et al, 2016).  
297 Weblogo of amino acid residues according to the multiple sequence alignment with  
298 *psTD* and other proteins in TD family (MSA-TD) was created in Weblogo  
299 (<http://weblogo.berkeley.edu/logo.cgi>). The MSA-TD was mapped to the *psTD*

300 structure using ConSurf Server (<https://consurf.tau.ac.il/>) (Ashkenazy et al, 2010).  
301 The proteins used in MSA-TD are shown in Supplementary, Fig. S3B.

### 302 **Construction of deletion mutants and complementation strains in *P. stutzeri* 273.**

303 Gene knockout in *P. stutzeri* 273 was made following the conjugation method  
304 described previously (Wu et al, 2017; Zheng et al, 2020). Fragments for mutant  
305 construction were amplified from the chromosome of *P. stutzeri* 273 by primers  
306 shown in Supplementary Table S1. Purified homologous fragments upstream and  
307 downstream of the target region were digested and ligated into the suicide vector  
308 pEX18Gm containing an *oriT* for conjugation. The constructed vector was transferred  
309 into *E. coli* SY327 and then *E. coli* S17-1 in turn. Using *E. coli* S17-1 as a donor  
310 strain, the constructed vector was transferred into *P. stutzeri* 273 by intergeneric  
311 conjugation at 28 °C for 48 h. After mating, cells were plated on LB agar plate with  
312 Cm and Gm to screen for single-event positive recombinant strains. The individual  
313 colony was used for second crossover. Sucrose counter-selection produced mutants  
314 without the pEX18Gm region. All double-recombination mutant candidates were  
315 verified by PCR amplification and sequencing. The primers used for validating  
316 complete removal of the target region from the host genome were shown in  
317 Supplementary Table S1.

318 The plasmid pUCP18 was used to construct complementary strains. The gene of  
319 *psTD* together with its native promoter was amplified from the wild-type *P. stutzeri*  
320 273 by primers listed in Supplementary Table S1. The purified PCR product was  
321 inserted into *HindIII/BamHI* site of pUCP18 to produce pUCP18-*TD*. Then  
322 pUCP18-*TD* was transferred into mutant strain  $\Delta TD$ . The final complementary strain  
323  $\Delta TD/cTD$  was verified by PCR amplification and sequencing.

### 324 **In-gel detection of H<sub>2</sub>S producing enzyme.**

325 The enzymes degrading L-cysteine and forming H<sub>2</sub>S were detected using an in-gel  
326 activity assay with bismuth staining (Basic et al, 2017; Yoshida et al, 2010). Briefly,  
327 the cell lysates obtained by sonication were applied to Native-PAGE gel (12%). After

328 electrophoresis, the gel was incubated in 100 mmol/L triethanolamine-HCl pH 7.6, 10  
329  $\mu$ mol/L pyridoxal 5-phosphate monohydrate, 1.0 mmol/L bismuth trichloride, 10  
330 mmol/L EDTA and 20 mmol/L L-cysteine at 37 °C for 30 min or 3 h. H<sub>2</sub>S formed  
331 during the enzymatic reaction precipitated as insoluble bismuth sulfide, and H<sub>2</sub>S  
332 producing enzymes appeared as brown to black bands in the gels.

### 333 **Expression and purification of psTD or its mutants.**

334 The gene encoding psTD or its mutant was cloned into a pET-28a expression vector  
335 incorporating an N-terminal His tag fusion. The vector pET-28a containing psTD  
336 encoding gene was used as a template for construction of different mutants of psTD.  
337 The mutation in the 77<sup>th</sup> amino acid (R77) of psTD was introduced by site-directed  
338 mutagenesis using KOD -Plus- Mutagenesis Kit (TOYOBO, Japan) to express psTD  
339 R77A (R is replaced with A), R77E (R is replaced with E), and R77K (R is replaced  
340 with K), respectively. The primers used for site-directed mutagenesis were shown in  
341 Supplementary Table S1. To express psTD or its mutants, plasmid containing different  
342 target gene was transformed into *E. coli* BL21 cells (Zheng et al, 2020). An overnight  
343 culture of *E. coli* BL21 cells containing different expression vector was inoculated  
344 into 1 L LB broth. Cultures were grown for 3 h at 37 °C with aeration (150 rpm) until  
345 an OD<sub>600</sub> of 0.8 was reached. Then the expression was induced by 0.1 mmol/L IPTG  
346 at 16 °C for 12 h. Thereafter, cells were collected by centrifugation (8,000 × g, 20  
347 min), resuspended in lysis buffer (50 mM Tris, 150 mM NaCl, pH 8.0) and subjected  
348 to sonication. Following lysis, the extract was centrifuged, filtered, and injected into a  
349 HisTrap high-performance (HP) column (5 mL) (GE Healthcare, America). The  
350 proteins were eluted with increasing concentrations of imidazole buffer (50 mM Tris,  
351 150 mM NaCl, and 50-250 mM imidazole). After overnight dialysis to Tris buffer (10  
352 mM Tris, 150 mM NaCl, 10% glycerol, pH 8.0), the protein solution was applied to a  
353 HiTrap™ Q HP column (GE Healthcare) and eluted with linear gradient of 0.15-2.0  
354 M of NaCl in 10 mM Tris (pH 8.0). After overnight dialysis to Tris buffer (10 mM  
355 Tris, 150 mM NaCl, pH 8.0), active fractions were collected and concentrated by  
356 ultrafiltration (MWCO 10 kDa, Millipore), and loaded onto a Hiload™ 16/600

357 superdex<sup>TM</sup> 200 column (GE Healthcare, USA) pre-equilibrated with 10 mM Tris  
358 (pH 8.0) containing 150 mM NaCl. Bound proteins were eluted with the equivalent  
359 buffer at a flow rate of 1 ml/min. The purity of fractions collected was determined by  
360 SDS-PAGE. Protein aliquots were quick-frozen in liquid nitrogen and stored in -80 °C  
361 till future use.

### 362 **Liquid chromatography-mass spectrometry (LC-MS) analysis.**

363 To find out the products from L-cysteine catalyzed by psTD, the mixture of 20  
364 mmol/L L-cysteine and 0.1 mg/mL psTD in Tris buffer (50 g/L Tris, 150 g/L NaCl,  
365 pH 7.5) was incubated at 37 °C for 2 h. After protein precipitation by trichloroacetic  
366 acid, 1.75 mL borate buffer (1 mol/L, pH 9.0), 750 µL methanol, 1 mL enzymatic  
367 mixture, and 30 µL of diethyl ethoxymethylenemalonate (DEEMM) were mixed in a  
368 screw-cap test tube, treated in ultrasound bath over 30 min, and then heated at 70 °C  
369 for 2 h allow complete degradation of excess DEEMM and reagent byproducts  
370 (Gomez-Alonso et al, 2007). After derivatization, the reaction products were analyzed  
371 by liquid chromatography (Agilent Technologies)-mass spectrometry (BRUKER,  
372 maxis plus) (LC-MS). Pyruvate concentration in the enzymatic mixture was measured  
373 using 2,4-dinitrophenylhydrazine by monitoring the absorbance at 515 nm in relation  
374 to a standard curve (Anthon & Barrett, 2003).

### 375 **Crystallization and structural determination.**

376 Purified psTD or corresponding mutant was mixed with PLP (2 mmol/L) to a final  
377 concentration at 10.8 mg/mL (psTD or mutants) in the buffer containing 20 mmol/L  
378 Tris-HCl, 150 mmol/L NaCl, 1 mmol/L β-mercaptoethanol, pH 8.0. psTD, its  
379 corresponding mutant or psTD-PLP/psTD mutant-PLP complexes were screened for  
380 crystallization conditions using sitting-drop vapor diffusion at 6, 12 and 18 µg/mL.  
381 Crystals were formed in 1.8 µmol/L ammonium sulfate, 0.1 mol/L Bis-Tris (pH 6.5), 2%  
382 (v/v) PEG 550 (E11 condition), or 0.1 mol/L NaAc·3H<sub>2</sub>O (pH 4.6), 3.5 mol/L  
383 HCOONa (C6 condition) within a week. Crystals were harvested and soaked in well  
384 solution containing 25% glycerol before flash frozen in liquid nitrogen. Crystals data

385 were collected at 100 K at the beamline BL17U1 and BL19U1 at the Shanghai  
386 Synchrotron Radiation Facility (SSRF, China). The homolog model of TD was used  
387 for molecular replace with PHENIX, and the structure model was manually modified  
388 and refined by PHENIX through iterative cycles. The final refinement statistics are  
389 given in Table 1. All Figures were created with PyMOL (<http://www.pymol.org/>).

#### 390 **Statistical analysis.**

391 All experiments were performed in triplicate and the data were expressed as mean  $\pm$   
392 standard deviation. The statistical analyses were performed with one-way analysis of  
393 variance (ANOVA). A multiple comparison Tukey test was used to evaluate if  
394 significant differences among treatments existed.

#### 395 **Data availability.**

396 All proteomics related data have been deposited to the ProteomeXchange Consortium  
397 via the PRIDE partner repository (dataset identifier PXD011469). The structures of  
398 psTD (C6 condition, native structure with PLP bound), psTD (E11 condition), psTD  
399 (psTD-PLP co-crystal complex with C6 condition), and psTD mutant (R77E mutation  
400 with C6 condition) have been deposited in the Protein Data Bank (PDB) under the  
401 accession codes 7DAP, 7DAQ, 7D8Y, and 7DAR, respectively.

#### 402 **Acknowledgments**

403 This work was funded by the China Ocean Mineral Resources R&D Association  
404 Grant (Grant No. DY135-B2-14), Strategic Priority Research Program of the Chinese  
405 Academy of Sciences (Grant No. XDA22050301), National Key R and D Program of  
406 China (Grant No. 2018YFC0310800), the Taishan Young Scholar Program of  
407 Shandong Province (tsqn20161051), Qingdao Innovation Leadership Program (Grant  
408 No. 18-1-2-7-zhc) for Chaomin Sun, and General Project of the National Natural  
409 Science Foundation of China (11179012), National Key Basic Research and  
410 Development Plan (973 Plan, 2011CB710800) for Wen Zhang.

#### 411 **Author contributions**



412 NM and CS conceived and designed the experiments. NM performed majority of the  
413 experiments and analyzed the data. NM, YS, and WZ purified proteins. YS, WZ  
414 design the crystallization experiments, grew crystals, collected data, solved the  
415 structures and carried out the structure analysis. NM, WZ and CS prepared the  
416 Figures and wrote the paper with all the inputs of all authors.

## 417 **Competing interests**

418 The authors declare no competing interests.

## 419 **References**

- 420 Alexander FW, Sandmeier E, Mehta PK, Christen P (1994) Evolutionary relationships among  
421 pyridoxal-5'-phosphate-dependent enzymes. Regio-specific alpha, beta and gamma families. *Eur J*  
422 *Biochem* **219**: 953-960
- 423 Anthon GE, Barrett DM (2003) Modified method for the determination of pyruvic acid with  
424 dinitrophenylhydrazine. In the assessment of onion pungency. *J Sci Food Agr* **83**: 1210-1213
- 425 Ashkenazy H, Erez E, Martz E, Pupko T, Ben-Tal N (2010) ConSurf 2010: calculating evolutionary  
426 conservation in sequence and structure of proteins and nucleic acids. *Nucleic Acids Res* **38**:  
427 W529-W533
- 428 Awano N, Wada M, Mori H, Nakamori S, Takagi H (2005) Identification and functional analysis of  
429 *Escherichia coli* cysteine desulfhydrases. *Appl Environ Microb* **71**: 4149-4152
- 430 Basic A, Blomqvist M, Dahlén G, Svensäter G (2017) The proteins of *Fusobacterium* spp. involved in  
431 hydrogen sulfide production from L-cysteine. *BMC Microbiol* **17**: 61
- 432 Chiku T, Padovani D, Zhu W, Singh S, Vitvitsky V, Banerjee R (2009) H<sub>2</sub>S biogenesis by human  
433 cystathionine  $\gamma$ -lyase leads to the novel sulfur metabolites lanthionine and homolanthionine and is  
434 responsive to the grade of hyperhomocysteinemia. *J Biol Chem* **284**: 11601-11612
- 435 Devi S, Rehman SAA, Tarique KF, Gourinath S (2017) Structural characterization and functional  
436 analysis of cystathionine beta-synthase: an enzyme involved in the reverse transsulfuration pathway of  
437 *Bacillus anthracis*. *Febs J* **284**: 3862-3880
- 438 Dunleavy R, Lu L, Kiely CJ, Mcintosh S, Berger BW (2016) Single-enzyme biomineralization of  
439 cadmium sulfide nanocrystals with controlled optical properties. *Proc Natl Acad Sci* **113**: 5275
- 440 Ernst DC, Downs DM (2018) Mmf1p couples amino acid metabolism to mitochondrial DNA  
441 maintenance in *Saccharomyces cerevisiae*. *Mbio* **9**: e00084-00018
- 442 Favrot L, Amorim Franco TM, Blanchard JS (2018) Biochemical characterization of the  
443 *Mycobacterium smegmatis* threonine deaminase. *Biochemistry* **57**: 6003-6012
- 444 Gallagher DT, Gilliland GL, Xiao GY, Zondlo J, Fisher KE, Chinchilla D, Eisenstein E (1998)  
445 Structure and control of pyridoxal phosphate dependent allosteric threonine deaminase. *Structure* **6**:  
446 465-475
- 447 Gomez-Alonso S, Hermosin-Gutierrez I, Garcia-Romero E (2007) Simultaneous HPLC analysis of  
448 biogenic amines, amino acids, and ammonium ion as aminoenone derivatives in wine and beer samples.



- 449 *J Agric Food Chem* **55**: 608-613
- 450 Harris CL (1981) Cysteine and growth inhibition of *Escherichia coli*: threonine deaminase as the target
- 451 enzyme. *J Bacteriol* **145**: 1031-1035
- 452 Johnson DC, Dean DR, Smith AD, Johnson MK (2005) Structure, function, and formation of biological
- 453 iron-sulfur clusters. *Annu Rev Biochem* **74**: 247-281
- 454 Kumar S, Stecher G, Tamura K (2016) MEGA7: Molecular evolutionary genetics analysis version 7.0
- 455 for bigger datasets. *Mol Biol Evol* **33**: 1870-1874
- 456 Lambrecht JA, Schmitz GE, Downs DM (2013) RidA proteins prevent metabolic damage inflicted by
- 457 PLP-dependent dehydratases in all domains of life. *Mbio* **4**: 8
- 458 Majtan T, Krijt J, Sokolova J, Krizkova M, Ralat MA, Kent J, Gregory JF, Kozich V, Kraus JP (2018)
- 459 Biogenesis of hydrogen sulfide and thioethers by cystathionine beta-synthase. *Antioxid Redox Sign* **28**:
- 460 311-323
- 461 Mihara H, Esaki N (2002) Bacterial cysteine desulfurases: their function and mechanisms. *Appl*
- 462 *Microbiol Biot* **60**: 12-23
- 463 Mironov A, Seregina T, Nagornyykh M, Luhachack LG, Korolkova N, Lopes LE, Kotova V, Zavilgelsky
- 464 G, Shakulov R, Shatalin K, Nudler E (2017) Mechanism of H<sub>2</sub>S-mediated protection against oxidative
- 465 stress in *Escherichia coli*. *P Natl Acad Sci USA* **114**: 6022-6027
- 466 O'Brien PJ, Herschlag D (1999) Catalytic promiscuity and the evolution of new enzymatic activities.
- 467 *Chem Biol* **6**: R91-R105
- 468 Pravda L, Berka K, Svobodová Vařeková R, Sehnal D, Banáš P, Laskowski RA, Koča J, Otyepka M
- 469 (2014) Anatomy of enzyme channels. *BMC Bioinformatics* **15**: 379
- 470 Schomburg D, Salzmann M (1990) *Threonine dehydratase*: Springer Berlin Heidelberg.
- 471 Shatalin K, Shatalina E, Mironov A, Nudler E (2011) H<sub>2</sub>S: a universal defense against antibiotics in
- 472 bacteria. *Science* **334**: 986-990
- 473 Simanshu DK, Chittori S, Savithri HS, Murthy MRN (2007) Structure and function of enzymes
- 474 involved in the anaerobic degradation of L-threonine to propionate. *J Biosciences* **32**: 1195-1206
- 475 Simanshu DK, Savithri HS, Murthy MRN (2006) Crystal structures of *Salmonella typhimurium*
- 476 biodegradative threonine deaminase and its complex with CMP provide structural insights into
- 477 ligand-induced oligomerization and enzyme activation. *J Biol Chem* **281**: 39630-39641
- 478 Sun QX, Collins R, Huang SF, Holmberg-Schiavone L, Anand GS, Tan CH, Van-Den-Berg S, Deng
- 479 LW, Moore PK, Karlberg T, Sivaraman J (2009) Structural basis for the inhibition mechanism of
- 480 human cystathionine gamma-lyase, an enzyme responsible for the production of H<sub>2</sub>S. *J Biol Chem* **284**:
- 481 3076-3085
- 482 Szabo C (2018) A timeline of hydrogen sulfide (H<sub>2</sub>S) research: From environmental toxin to biological
- 483 mediator. *Biochem Pharmacol* **149**: 5-19
- 484 Umbarger HE (1956) Evidence for a negative-feedback mechanism In the biosynthesis of isoleucine.
- 485 *Science* **123**: 848-848
- 486 Wang R (2012) Physiological implications of hydrogen sulfide: a whiff exploration that blossomed.
- 487 *Physiol Rev* **92**: 791-896
- 488 Wendisch VF (2007) *Amino acid biosynthesis pathways, regulation and metabolic engineering*:
- 489 Springer Berlin Heidelberg.
- 490 Wu S, Liu G, Jin W, Xiu P, Sun C (2016) Antibiofilm and anti-infection of a marine bacterial
- 491 exopolysaccharide against *Pseudomonas aeruginosa*. *Front Microbiol* **7**: 102
- 492 Wu S, Zheng R, Sha Z, Sun C (2017) Genome Sequence of *Pseudomonas stutzeri* 273 and

493 identification of the exopolysaccharide EPS273 biosynthesis locus. *Mar Drugs* **15**: 218  
494 Xia Y, Lü C, Hou N, Xin Y, Liu J, Liu H, Xun L (2017) Sulfide production and oxidation by  
495 heterotrophic bacteria under aerobic conditions. *Isme J* **11**: 2754  
496 Yan WP, Stone E, Zhang YJ (2017) Structural snapshots of an engineered cystathionine-gamma-lyase  
497 reveal the critical role of electrostatic interactions in the active site. *Biochemistry-Us* **56**: 876-885  
498 Yoshida Y, Ito S, Tamura H, Kunimatsu K (2010) Use of a novel assay to evaluate enzymes that  
499 produce hydrogen sulfide in *Fusobacterium nucleatum*. *J Microbiol Methods* **80**: 313  
500 Yu XF, Li Y, Wang XY (2013) Molecular evolution of threonine dehydratase in bacteria. *Plos One* **8**: 7  
501 Zhang J, Liu R, Xi SC, Cai RN, Zhang X, Sun CM (2020) A novel bacterial thiosulfate oxidation  
502 pathway provides a new clue about the formation of zero-valent sulfur in deep sea. *Isme J* **14**:  
503 2261-2274  
504 Zheng RK, Wu SM, Sun CM (2020) MerF is a novel regulator of deep-sea *Pseudomonas stutzeri*  
505 flagellum biogenesis and motility. *Environ Microbiol*  
506  
507  
  
508  
509

510 **Table 1** Diffraction data and refinement statistics of psTD, psTD/PLP and psTD (R77E).

| Crystals                       | psTD<br>(7DAQ)               | (E11)     | psTD<br>(7DAP)                | (C6)      | psTD<br>(7D8Y)                | (PLP)     | psTD<br>(7DAR)                | (R77E)    |
|--------------------------------|------------------------------|-----------|-------------------------------|-----------|-------------------------------|-----------|-------------------------------|-----------|
| <b>Data collection</b>         |                              |           |                               |           |                               |           |                               |           |
| Resolution range               | 34.41-1.451<br>(1.503-1.451) |           | 27.707-1.662<br>(1.721-1.662) |           | 26.85- 1.659<br>(1.718-1.659) |           | 35.579-1.698<br>(1.741-1.698) |           |
| Space group                    | P 62                         |           | P 62                          |           | P 62                          |           | P 62                          |           |
| Unit cell a, b, c (Å)          | 110.976                      | 110.976   | 110.829                       | 110.829   | 110.975                       | 110.975   | 110.801                       | 110.801   |
| α, β, γ (°)                    | 107.413                      | 90 90 120 | 106.895                       | 90 90 120 | 106.655                       | 90 90 120 | 106.738                       | 90 90 120 |
| Total reflections              | 1054052 (28804)              |           | 1720349 (139484)              |           | 1797197 (181118)              |           | 1623851 (135029)              |           |
| Unique reflections             | 110754 (13117)               |           | 87472 (4862)                  |           | 87968 (8766)                  |           | 80107 (4658)                  |           |
| Multiplicity                   | 9.5 (5.4)                    |           | 19.7 (16.0)                   |           | 20.3 (17.7)                   |           | 20.3 (16.9)                   |           |
| Completeness (%)               | 99.86 (98.86)                |           | 92.76 (55.74)                 |           | 99.79 (99.85)                 |           | 94.35 (58.33)                 |           |
| Mean I/sigma(I)                | 12.43 (0.14)                 |           | 12.59 (0.79)                  |           | 15.89 (2.77)                  |           | 11.86 (1.25)                  |           |
| Wilson B-factor                | 17.80                        |           | 23.88                         |           | 19.59                         |           | 14.54                         |           |
| R-merge                        | 0.12 (8.798)                 |           | 0.1768 (3.885)                |           | 0.1459 (0.8539)               |           | 0.1946 (2.143)                |           |
| R-meas                         | 0.1268 (9.73)                |           | 0.1815 (4.012)                |           | 0.1495 (0.8754)               |           | 0.1996 (2.21)                 |           |
| R-pim                          | 0.0403 (4.046)               |           | 0.041 (1.002)                 |           | 0.03272 (0.1922)              |           | 0.04399 (0.534)               |           |
| CC1/2                          | 0.999 (0.0437)               |           | 0.998 (0.3)                   |           | 0.989 (0.914)                 |           | 0.973 (0.513)                 |           |
| CC*                            | 1 (0.289)                    |           | 1 (0.679)                     |           | 0.997 (0.977)                 |           | 0.993 (0.824)                 |           |
| <b>Refinement</b>              |                              |           |                               |           |                               |           |                               |           |
| Reflections used in refinement | 131993 (13076)               |           | 81161 (4862)                  |           | 87806 (8766)                  |           | 75643 (4659)                  |           |
| Reflections used for R-free    | 1992 (199)                   |           | 1987 (119)                    |           | 1993 (198)                    |           | 1972 (118)                    |           |
| R-work                         | 0.1701 (0.2568)              |           | 0.1831 (0.2936)               |           | 0.1611 (0.2065)               |           | 0.1669 (0.2548)               |           |
| R-free                         | 0.1785 (0.2603)              |           | 0.2032 (0.2962)               |           | 0.1827 (0.2242)               |           | 0.1902 (0.2656)               |           |
| CC(work)                       | 0.471 (-0.013)               |           | 0.961 (0.701)                 |           | 0.964 (0.902)                 |           | 0.941 (0.794)                 |           |
| CC(free)                       | 0.474(0.094)                 |           | 0.954 (0.712)                 |           | 0.953 (0.892)                 |           | 0.935 (0.739)                 |           |
| Number of non-hydrogen atoms   | 5305                         |           | 5179                          |           | 5405                          |           | 5355                          |           |
| macromolecules                 | 4756                         |           | 4766                          |           | 4784                          |           | 4772                          |           |
| Protein residues               | 636                          |           | 638                           |           | 637                           |           | 637                           |           |
| <b>Deviation from identity</b> |                              |           |                               |           |                               |           |                               |           |
| RMS(bonds)                     | 0.005                        |           | 0.008                         |           | 0.007                         |           | 0.006                         |           |
| RMS(angles)                    | 0.80                         |           | 0.83                          |           | 0.89                          |           | 0.82                          |           |
| Average B-factor               | 21.57                        |           | 27.98                         |           | 23.24                         |           | 17.92                         |           |
| <b>Ramachandran plot</b>       |                              |           |                               |           |                               |           |                               |           |
| Ramachandran favored (%)       | 98.89                        |           | 98.74                         |           | 98.74                         |           | 99.05                         |           |
| Ramachandran allowed (%)       | 1.11                         |           | 1.26                          |           | 1.26                          |           | 0.95                          |           |
| Ramachandran outliers (%)      | 0.00                         |           | 0.00                          |           | 0.00                          |           | 0.00                          |           |
| Rotamer outliers (%)           | 0.00                         |           | 0.00                          |           | 0.00                          |           | 0.00                          |           |

511 **Figures**

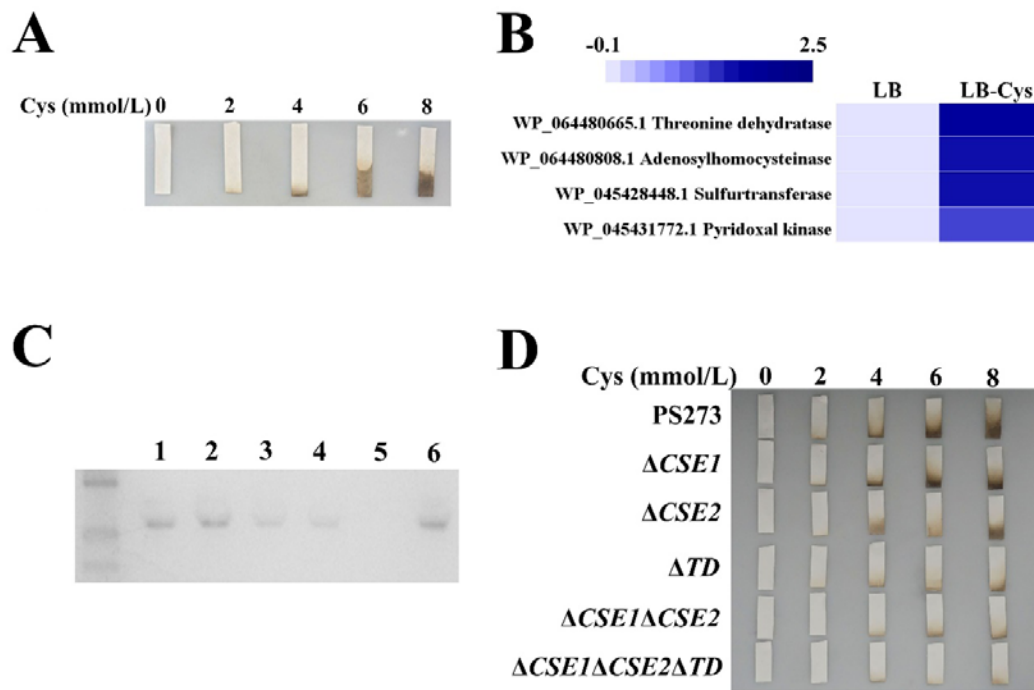

512

513 **Fig. 1 Key roles of psTD in driving intracellular H<sub>2</sub>S generation through**  
514 **degrading L-cysteine in *P. stutzeri* 273.** (A) H<sub>2</sub>S production of *P. stutzeri* 273  
515 challenged with different concentrations of Cys. (B) Proteomic assay of the relative  
516 level of proteins associated with cysteine metabolism in *P. stutzeri* 273 under LB  
517 alone and LB with 8 mmol/L L-cysteine. (C) The in-gel activity assay with bismuth  
518 staining applied for detecting the proteins that produced H<sub>2</sub>S from L-cysteine in *P.*  
519 *stutzeri* 273 wild type (PS273), mutant strains ( $\Delta CSE1$ ,  $\Delta CSE2$ ,  $\Delta CSE1\Delta CSE2$ ,  $\Delta TD$ ),  
520 and the psTD encoding gene complementary strain  $\Delta TD/cTD$ . Lane 1: PS273, Lane 2:  
521  $\Delta CSE1$ , Lane 3:  $\Delta CSE2$ , Lane 4:  $\Delta CSE1\Delta CSE2$ , Lane 5:  $\Delta TD$ , Lane 6:  $\Delta TD/cTD$ . (D)  
522 H<sub>2</sub>S production of PS273 and its mutant strains incubated in LB supplemented with  
523 different concentrations of Cys for 12 h.

524

525

526

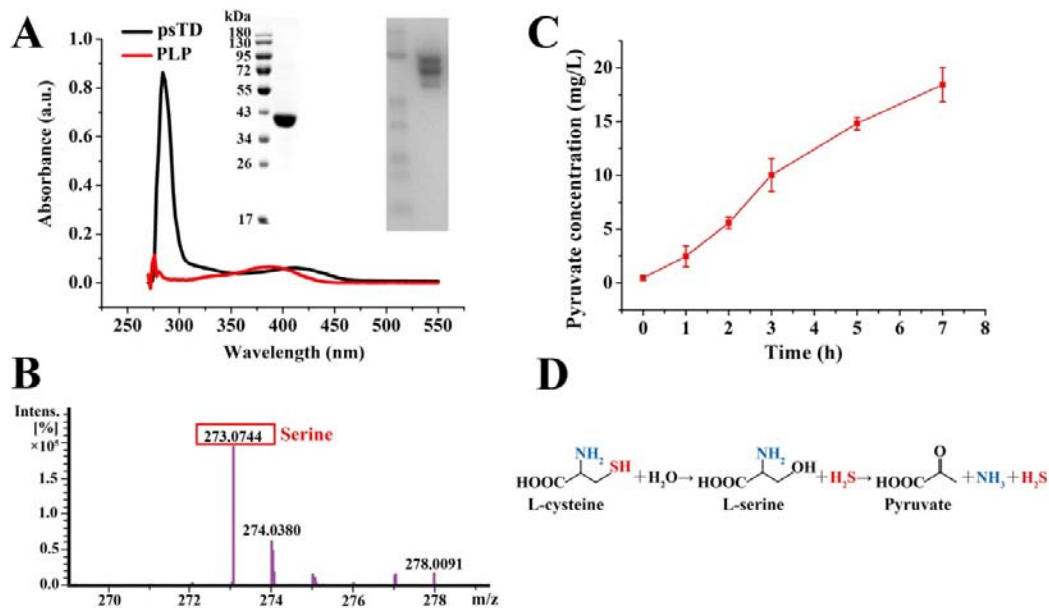

527

528 **Fig. 2 Products determination of L-cysteine catalyzed by psTD.** (A) Absorbance  
 529 spectrum of purified psTD in Tris buffer (50 mmol/L Tris, 150 mmol/L NaCl, 250  
 530 mmol/L imidazole, pH 8.0) (black line) and unbound pyridoxal 5'-phosphate (PLP)  
 531 (0.02 mmol/L in Tris buffer, red line). Insert in panel A: SDS-PAGE gel (left) of  
 532 purified psTD (20 µg) showing a size around 40 kDa and Native-PAGE gel (right)  
 533 with bismuth staining for 30 min showing psTD (0.4 µg) with the ability of catalyzing  
 534 H<sub>2</sub>S generation from L-cysteine. (B) LC-MS analysis of the reaction products  
 535 catalyzed by psTD. (C) Determination of pyruvate concentration in the enzymatic  
 536 mixture catalyzed by psTD. (D) The proposed reaction of L-cysteine catalyzed by  
 537 psTD.

538

539

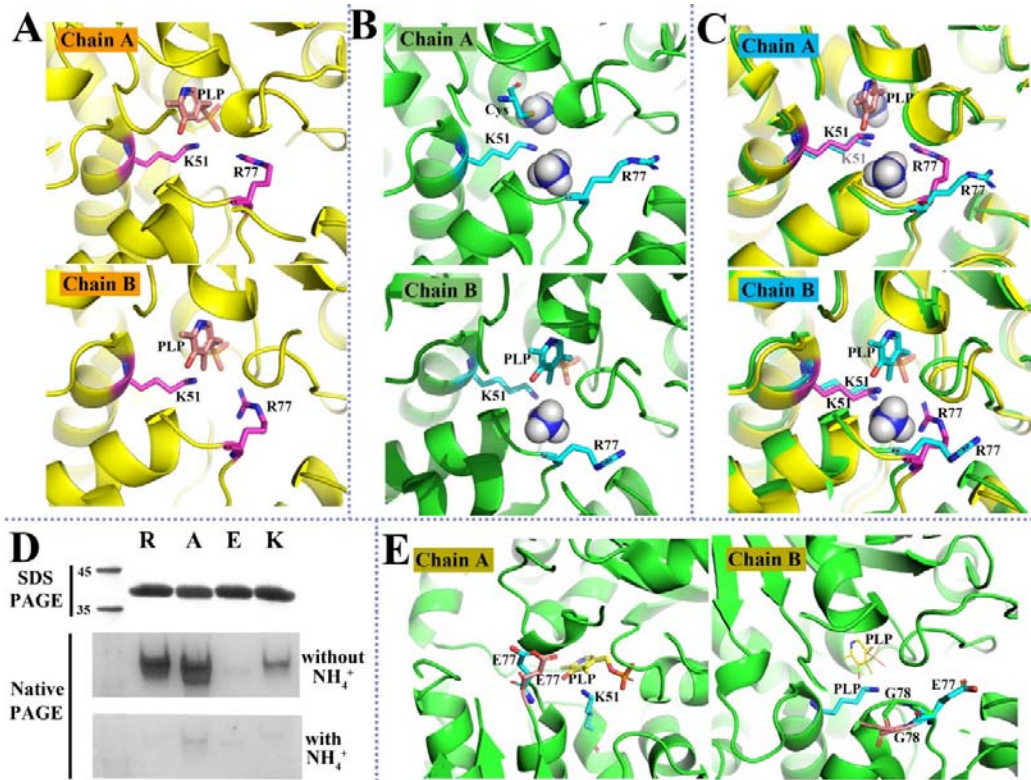

540

541 **Fig. 3 Structure comparison of different psTD crystal structures.** (A) PLP bound  
542 to K51 with possible covalent bond and covalent bond in chain A and chain B of  
543 structure 7DAP (carbon in purple for key residues), respectively. (B) An amino acid  
544 (e.g. cysteine) bound to K51 in chain A of structure 7DAQ (two  $\text{NH}_4^+$ , carbon in cyan  
545 for key residues); PLP bound to K51 with non-covalent bond in chain B of 7DAQ  
546 (one  $\text{NH}_4^+$ , R77 extending orientating outside for both chain A and B). (C) Structure  
547 comparison of 7DAQ and 7DAP for chain A (one  $\text{NH}_4^+$  overlapping with  $\text{PO}_4^-$  of the  
548 virtually corresponding PLP) and for chain B. (D) SDS-PAGE gel and Native-PAGE  
549 gel of purified psTD wild type (R) and variants R77A (A), R77E (E), and R77K (K)  
550 with bismuth staining (without or with 2 mol/L  $\text{NH}_4^+$ ) for 5 min. The loading amount  
551 of each lane is 9  $\mu\text{g}$ . (E) Dual conformation of E77 in chain A (7DAR, carbon in cyan  
552 for key residues, carbon in orange for alternative E77); Dual conformation G78 in  
553 chain B (7DAR, with the virtually corresponding PLP, carbon in orange for alternative  
554 G78).

555



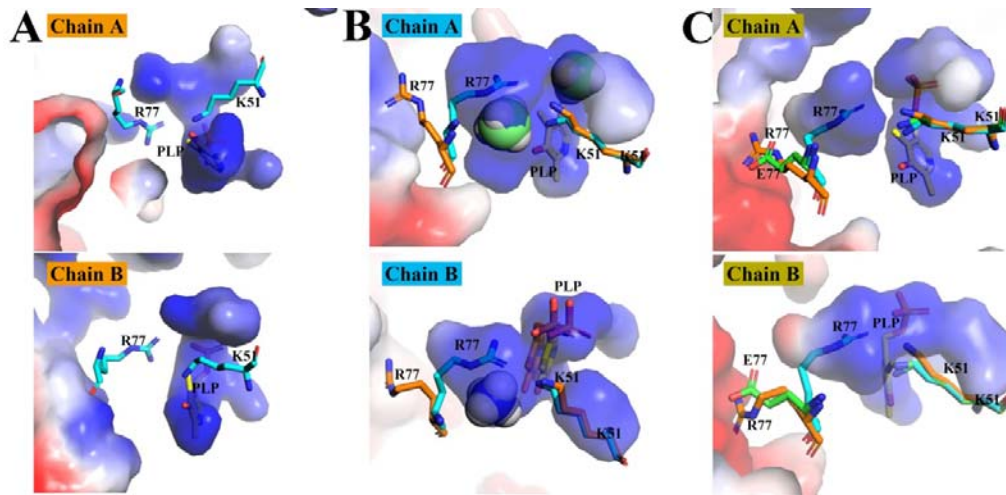

556

557 **Fig. 4 The map of electrostatic potential (MEP) comparison of the inside active**  
558 **sites from different psTD structures. (A) MEP inside of structure 7DAP (chain A**  
559 **and B, carbon in cyan). (B) MEP of 7DAQ and key residues comparison for 7DAQ**  
560 **(carbon in orange) and 7DAP (chain A and B). (C) MEP of 7DAR and key residues**  
561 **comparison for 7DAR (carbon in green), 7DAP and 7DAQ (chain A and B).**

562

563

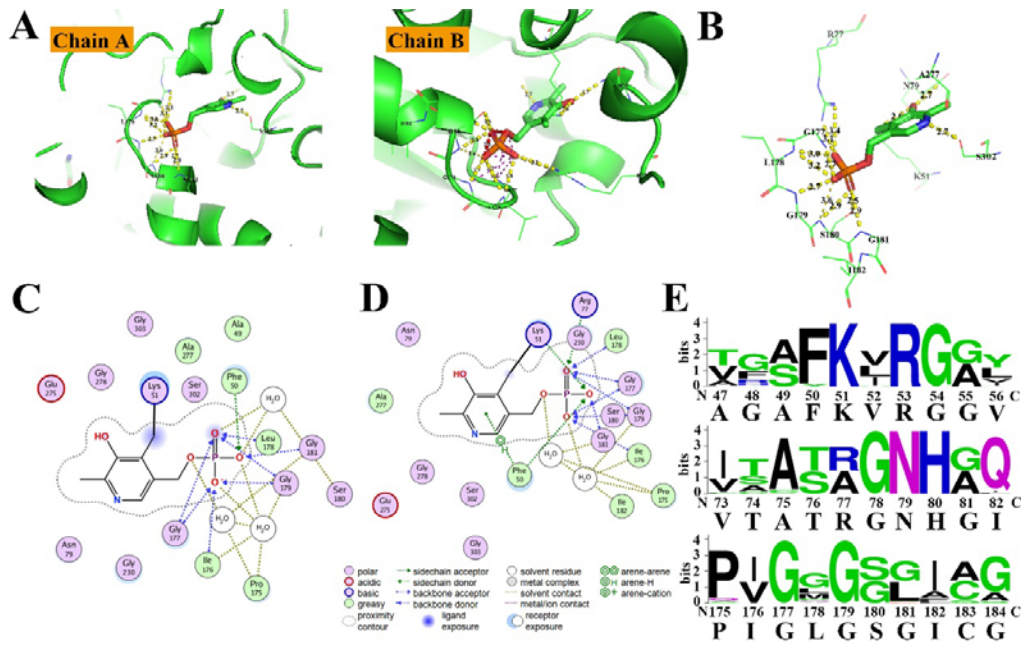

564

565 **Fig. 5 The molecular interactions between PLP and psTD near the active site. (A)**

566 The polar interactions between PLP and psTD structure (chain A and B of 7D8Y, the

567 same as below, dashed line indicates the possible hydrogen bonds). (B) The PLP

568 contacting residues of psTD (chain A). (C, D) 2D plot of the interactions between

569 PLP and psTD (chain A and B). (E) Weblogo for the amino acids around K51, R77

570 and G177-G181. The size of a single letter amino acid code in the sequence logo

571 represents the occurrence of a particular amino acid at a particular position. The

572 numbers are the locations of amino acids in psTD. psTD sequence is underneath of

573 the horizontal axis.

574



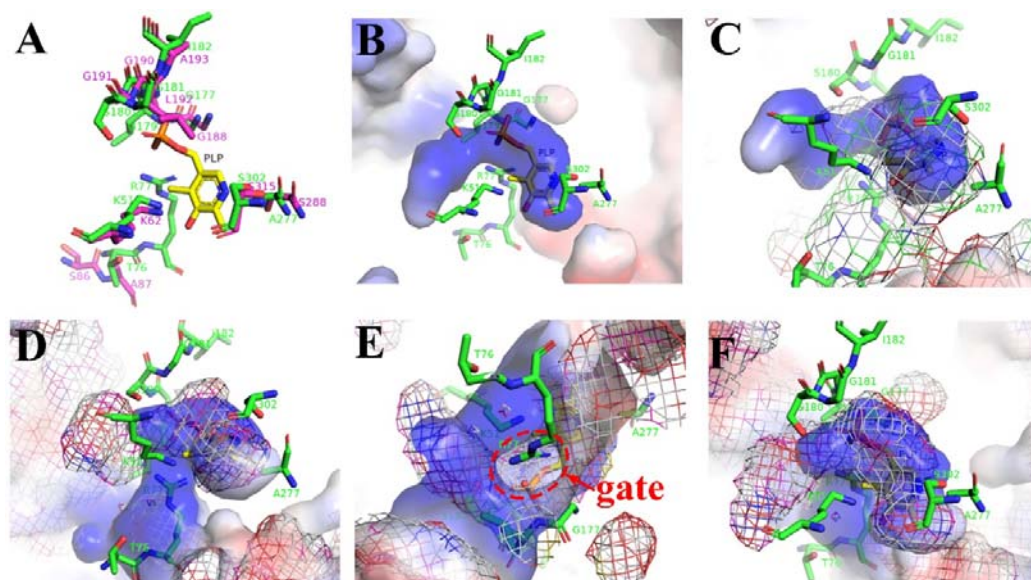

575

576 **Fig. 6 The detailed comparison of active sites from psTD and 1TDJ.** (A) Key  
577 residues comparison around PLP between psTD (chain B of 7D8Y, green carbon) and  
578 1TDJ (purple carbon). (B) Pockets of active site from psTD with surrounding residues  
579 interacting PLP. (C) MEP of psTD (surface) and 1TDJ (mesh). (D), (E), (F) MEP of  
580 psTD (mesh) and 1TDJ (surface) from three different views. The access channel (or  
581 gate) for active site of 1TDJ is circled with red dashline in (E).

582

583

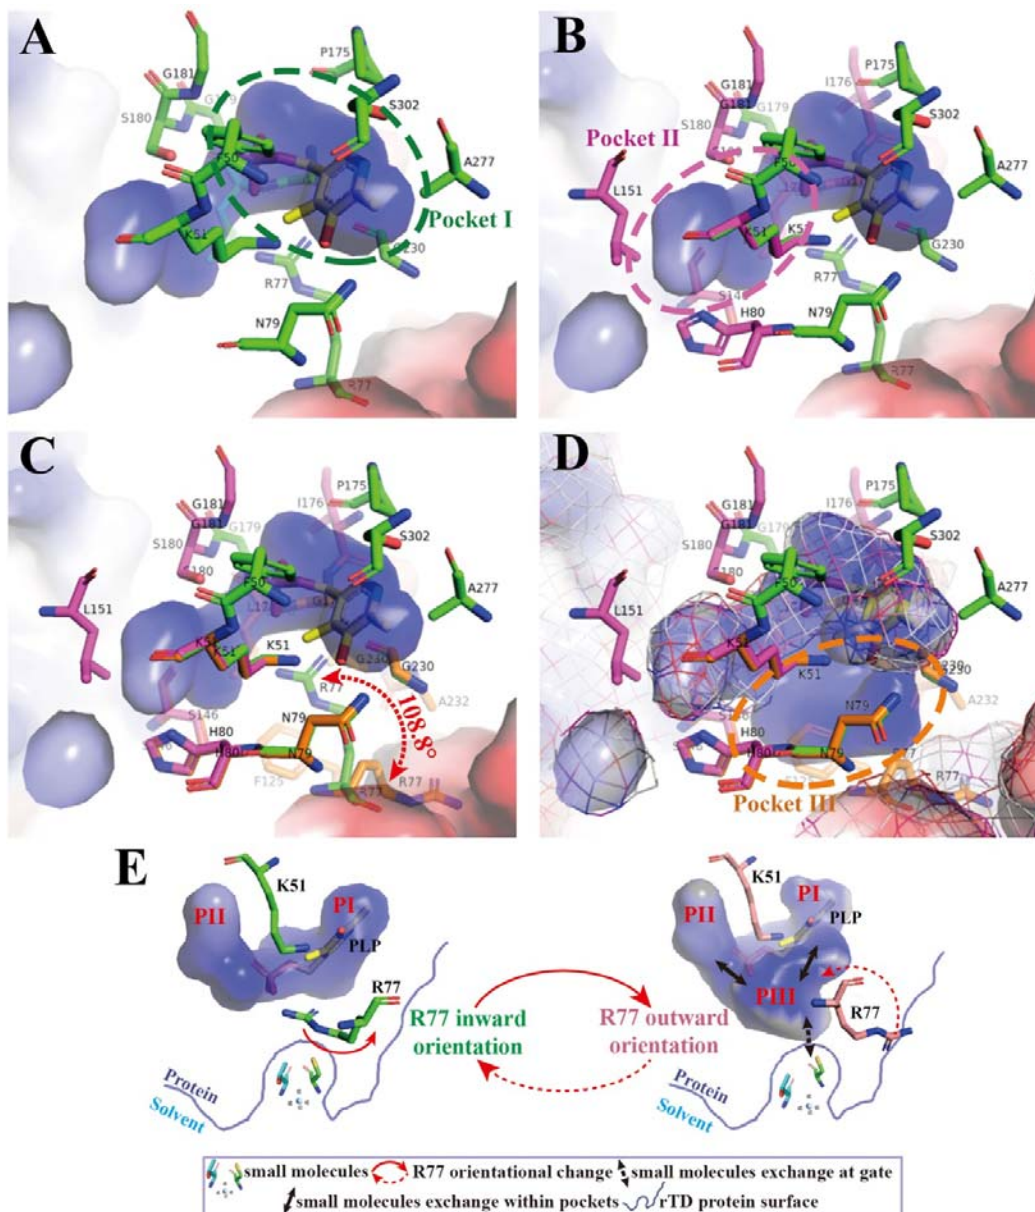

584

585 **Fig. 7 Three pockets of active site of psTD structure.** Pocket I (occupied by PLP),  
 586 Pocket II (for reaction products/small molecules), and Pocket III (access channel) of  
 587 active site from psTD (chain B of 7D8Y). (A) Key residues interacting with PLP at  
 588 Pocket I (green circle, residues in green carbon). (B) Key residues of Pocket I and II  
 589 (deep purple circle, residues in deep purple carbon). Key residues of Pocket I and II  
 590 (R77 inward orientation) (C), and together with Pocket III (brown circle, residues in  
 591 brown carbon) (R77 outward orientation), comparing with Pockets I and II MEP in

592 mesh (**D**). Notes: Pocket I and II with R77 inward orientation shown as MEP surface  
593 in A, B and C; R77 outward orientation shown in D; both R77 inward and outward  
594 conformations compared and shown rotation angle in C. (**E**) Proposed mechanisms of  
595 structure dynamics and specificity for psTD enzyme activities: R77 switch states  
596 between inward and outward orientation, which results in PIII open or close for small  
597 molecule exchange and corresponding reactions.

598

599
